# Supplementary material
Source: PubMed Central journal article supplement (PMC8176539)
Supplement: mmc1.pdf [file mmc1.pdf]

## Supplemental information

### Antibody evasion by the P.1 strain of SARS-CoV-2

Wanwisa Dejnirattisai, Daming Zhou, Piyada Supasa, Chang Liu, Alexander J. Mentzer, Helen M. Ginn, Yuguang Zhao, Helen M.E. Duyvesteyn, Aekkachai Tuekprakhon, Rungtiwa Nutalai, Beibei Wang, César López-Camacho, Jose Slon-Campos, Thomas S. Walter, Donal Skelly, Sue Ann Costa Clemens, Felipe Gomes Naveca, Valdinete Nascimento, Fernanda Nascimento, Cristiano Fernandes da Costa, Paola Cristina Resende, Alex Pauvolid-Correa, Marilda M. Siqueira, Christina Dold, Robert Levin, Tao Dong, Andrew J. Pollard, Julian C. Knight, Derrick Crook, Teresa Lambe, Elizabeth Clutterbuck, Sagida Bibi, Amy Flaxman, Mustapha Bittaye, Sandra Belij-Rammerstorfer, Sarah C. Gilbert, Miles W. Carroll, Paul Klenerman, Eleanor Barnes, Susanna J. Dunachie, Neil G. Paterson, Mark A. Williams, David R. Hall, Ruben J.G. Hulswit, Thomas A. Bowden, Elizabeth E. Fry, Juthathip Mongkolsapaya, Jingshan Ren, David I. Stuart, and Gavin R. Screaton

Table S1 Data collection and refinement statistics of RBD complexes, related to X-ray data collection, structure determination and refinement, STAR Methods

| Structure                             | RBD-EY6A-222                                  | K417N-RBD-EY6A-222                            | K417T-RBD-EY6A-222                            | B.1.1.7-RBD-EY6A-222                          | P.1-RBD-EY6A-222                              | B.1.351-RBD-EY6A-222                          | P.1-RBD-ACE2                     |
|---------------------------------------|-----------------------------------------------|-----------------------------------------------|-----------------------------------------------|-----------------------------------------------|-----------------------------------------------|-----------------------------------------------|----------------------------------|
| <b>PDB ID</b>                         | 7NX6                                          | 7NX7                                          | 7NX8                                          | 7NX9                                          | 7NXB                                          | 7NXA                                          | 7NXC                             |
| <b>Data collection</b>                |                                               |                                               |                                               |                                               |                                               |                                               |                                  |
| Space group                           | P2 <sub>1</sub> 2 <sub>1</sub> 2 <sub>1</sub> | P2 <sub>1</sub> 2 <sub>1</sub> 2 <sub>1</sub> | P2 <sub>1</sub> 2 <sub>1</sub> 2 <sub>1</sub> | P2 <sub>1</sub> 2 <sub>1</sub> 2 <sub>1</sub> | P2 <sub>1</sub> 2 <sub>1</sub> 2 <sub>1</sub> | P2 <sub>1</sub> 2 <sub>1</sub> 2 <sub>1</sub> | P4 <sub>1</sub> 2 <sub>1</sub> 2 |
| Cell dimensions                       |                                               |                                               |                                               |                                               |                                               |                                               |                                  |
| a, b, c (Å)                           | 54.4, 120.1, 211.7                            | 54.7, 122.4, 213.7                            | 54.8, 122.7, 213.9                            | 54.3, 120.9, 210.2                            | 54.7, 122.8, 212.3                            | 54.2, 120.4, 211.6                            | 103.5, 103.5, 225.9              |
| a, b, g (°)                           | 90, 90, 90                                    | 90, 90, 90                                    | 90, 90, 90                                    | 90, 90, 90                                    | 90, 90, 90                                    | 90, 90, 90                                    | 90, 90, 90                       |
| Resolution (Å)                        | 120–2.25 (2.29–2.25) <sup>a</sup>             | 81–2.30 (2.30–2.34)                           | 81–1.95 (1.98–1.95)                           | 79–2.40 (2.44–2.40)                           | 80–2.67 (2.72–2.67)                           | 61–2.50 (2.54–2.50)                           | 70–3.14 (3.27–3.14)              |
| R <sub>merge</sub>                    | 0.438 (---)                                   | 0.245 (---)                                   | 0.120 (0.990)                                 | 0.257 (---)                                   | 0.365 (---)                                   | 0.401 (---)                                   | 0.500 (---)                      |
| R <sub>pim</sub>                      | 0.073 (0.767)                                 | 0.039 (0.367)                                 | 0.034 (0.972)                                 | 0.051 (0.547)                                 | 0.072 (1.176)                                 | 0.080 (1.086)                                 | 0.100 (1.087)                    |
| I/s(I)                                | 4.3 (0.3)                                     | 7.7 (0.4)                                     | 12.0 (0.4)                                    | 7.7 (0.6)                                     | 7.0 (0.4)                                     | 4.6 (0.3)                                     | 5.3 (0.5)                        |
| CC <sub>1/2</sub>                     | 0.991 (0.320)                                 | 0.997 (0.664)                                 | 0.996 (0.354)                                 | 0.995 (0.584)                                 | 0.997 (0.344)                                 | 0.992 (0.360)                                 | 0.992 (0.306)                    |
| Completeness (%)                      | 99.8 (95.8)                                   | 100 (99.7)                                    | 100 (99.6)                                    | 100 (98.5)                                    | 100 (97.7)                                    | 99.9 (94.2)                                   | 100 (98.1)                       |
| Redundancy                            | 34.8 (17.3)                                   | 39.6 (36.0)                                   | 13.4 (13.2)                                   | 26.6 (25.8)                                   | 26.3 (27.5)                                   | 26.3 (27.1)                                   | 25.7 (27.1)                      |
| <b>Refinement</b>                     |                                               |                                               |                                               |                                               |                                               |                                               |                                  |
| Resolution (Å)                        | 106–2.25                                      | 81–2.30                                       | 81–1.95                                       | 79–2.40                                       | 80–2.67                                       | 61–2.50                                       | 70–3.14                          |
| No. reflections                       | 61666/3310                                    | 6175/3233                                     | 100792/5255                                   | 52327/2727                                    | 39534/2103                                    | 45980/2393                                    | 20278/1904                       |
| R <sub>work</sub> / R <sub>free</sub> | 0.207/0.248                                   | 0.208/0.239                                   | 0.223/0.246                                   | 0.200/0.229                                   | 0.213/0.251                                   | 0.205/0.253                                   | 0.226/0.278                      |
| No. atoms                             |                                               |                                               |                                               |                                               |                                               |                                               |                                  |
| Protein                               | 8014                                          | 8004                                          | 8017                                          | 8012                                          | 8025                                          | 8014                                          | 6405                             |
| Ligand/ion/water                      | 386                                           | 373                                           | 389                                           | 345                                           | 182                                           | 192                                           | 70                               |
| B factors (Å <sup>2</sup> )           |                                               |                                               |                                               |                                               |                                               |                                               |                                  |
| Protein                               | 67                                            | 87                                            | 78                                            | 72                                            | 91                                            | 77                                            | 90                               |
| Ligand/ion/water                      | 60                                            | 72                                            | 50                                            | 67                                            | 84                                            | 92                                            | 102                              |
| r.m.s. deviations                     |                                               |                                               |                                               |                                               |                                               |                                               |                                  |
| Bond lengths (Å)                      | 0.002                                         | 0.003                                         | 0.002                                         | 0.002                                         | 0.002                                         | 0.002                                         | 0.003                            |
| Bond angles (°)                       | 0.5                                           | 0.6                                           | 0.5                                           | 0.5                                           | 0.5                                           | 0.5                                           | 0.6                              |

<sup>a</sup>Values in parentheses are for highest-resolution shell.

Table S2 Monoclonal antibody neutralization and binding data, related to Figures 2 and 3

| mAb       | IC50 (ug/ml)  |               |               |               | FRNT <sup>50</sup> ratio |                      |                  | KD (nM)       |                |                |                |             | Immunoglobulin gene usage |              |               |
|-----------|---------------|---------------|---------------|---------------|--------------------------|----------------------|------------------|---------------|----------------|----------------|----------------|-------------|---------------------------|--------------|---------------|
|           | Victoria      | B.1.1.7       | B.1.351       | P.1           | B.1.1.7/<br>Victoria     | B.1.351/<br>Victoria | P.1/<br>Victoria | Native<br>RBD | K417T          | K417N          | E484K          | RBD P.1     | IGHV                      | K/ $\lambda$ | IGLV          |
| 40        | 0.026 ± 0.007 | 0.035 ± 0.008 | 0.738 ± 0.311 | 0.153 ± 0.037 | 1.4                      | 28.6                 | 5.9              | 1.33±0.03     | 38.90±0.89     | 56.7±1.18      | 7.31±0.03      | 38.20±0.95  | 3-66                      | K            | 1-33 or 1D-33 |
| 55        | 0.095 ± 0.015 | 0.348 ± 0.044 | 0.127 ± 0.014 | 0.306 ± 0.046 | 3.7                      | 1.3                  | 3.2              | 2.66±0.05     | 4.60±0.12      | 4.21±0.09      | 3.82±0.02      | 11.10±0.37  | 1-58                      | K            | 3-20          |
| 58        | 0.041 ± 0.003 | 0.116 ± 0.029 | 0.136 ± 0.010 | 0.236 ± 0.075 | 2.8                      | 3.3                  | 5.7              | 1.46±0.04     | 1.83±0.02      | 2.75±0.03      | 0.97±0.04      | 2.84±0.03   | 3-9                       | $\lambda$    | 3-21          |
| 88        | 0.033 ± 0.001 | 0.058 ± 0.008 | >10           | >10           | 1.8                      | >307.6               | >307.6           | 2.90±0.03     | Knocked<br>out | Knocked<br>out | 5.37±0.06      | Knocked out | 4-61                      | $\lambda$    | 1-36          |
| 132       | 0.048 ± 0.000 | 0.337 ± 0.048 | >10           | >10           | 7.0                      | >208.4               | >208.4           | 2.93±0.10     | 1846±364       | 2495±1095      | 29.80±0.36     | 1338±452    | 4-34                      | $\lambda$    | 7-46          |
| 150       | 0.012 ± 0.000 | 0.139 ± 0.019 | 0.350 ± 0.010 | 0.040 ± 0.003 | 12.0                     | 30.0                 | 3.4              | 0.40±0.01     | 1.64±0.02      | 3.35±0.03      | 1.83±0.03      | 8.90±0.13   | 3-53                      | K            | 1-9           |
| 158       | 0.031 ± 0.004 | 0.254 ± 0.109 | >10           | >10           | 8.3                      | >327.5               | >327.5           | 1.89±0.03     | 4.83±0.06      | 9.35±0.11      | 3.03±0.10      | 18.20±0.31  | 3-53                      | K            | 1-9           |
| 159       | 0.011 ± 0.000 | 0.061 ± 0.020 | >10           | 1.434 ± 0.804 | 5.7                      | >928.4               | 133.2            | N/A           | N/A            | N/A            | N/A            | N/A         | 3-30                      | K            | 3-20          |
| 165       | 0.034 ± 0.004 | 0.212 ± 0.004 | 0.054 ± 0.013 | 0.241 ± 0.030 | 6.3                      | 1.6                  | 7.2              | 2.15±0.03     | 2.62±0.06      | 3.29±0.05      | 3.49±0.03      | 7.10±0.15   | 1-58                      | K            | 3-20          |
| 170       | 0.025 ± 0.004 | 0.105 ± 0.050 | >10           | >10           | 4.2                      | >402.2               | >402.2           | 5.23±0.02     | 6.24±0.04      | 6.95±0.05      | Knocked<br>out | 463.4±25.4  | 5-51                      | K            | 2D-29         |
| 175       | 0.026 ± 0.000 | 0.575 ± 0.280 | >10           | 3.881 ± 0.738 | 22.5                     | >391.5               | 151.9            | 1.36±0.01     | 3.17±0.02      | 8.60±0.04      | 10.8±0.07      | 68.30±0.50  | 3-53                      | K            | 1-33 or 1D-33 |
| 222       | 0.019 ± 0.000 | 0.014 ± 0.002 | 0.017 ± 0.005 | 0.008 ± 0.003 | 0.7                      | 0.9                  | 0.4              | 1.36±0.08     | 3.96±0.11      | 5.16±0.12      | 2.25±0.04      | 1.92±0.01   | 3-53                      | K            | 3-20          |
| 253       | 0.055 ± 0.008 | 0.126 ± 0.018 | 0.109 ± 0.055 | 0.137 ± 0.005 | 2.3                      | 2.0                  | 2.5              | 1.15±0.03     | 5.99±0.11      | 6.11±0.11      | 2.66±0.03      | 4.25±0.11   | 1-58                      | K            | 3-20          |
| 269       | 0.030 ± 0.000 | >10           | >10           | >10           | >337.5                   | >337.5               | >337.5           | 0.76±0.02     | 6.69±0.04      | 8.88±0.04      | 1.29±0.03      | Knocked out | 3-53                      | K            | 1-9           |
| 278       | 0.014 ± 0.007 | 0.307 ± 0.149 | 0.160 ± 0.018 | 0.245 ± 0.042 | 22.5                     | 11.7                 | 17.9             | 4.16±0.03     | 5.21±0.03      | 6.37±0.03      | 6.95±0.27      | 16.20±0.17  | 1-18                      | K            | 1-39 or 1D-39 |
| 281       | 0.005 ± 0.001 | 0.012 ± 0.000 | >10           | >10           | 2.5                      | >2026.3              | >2026.3          | 0.97±0.03     | 0.68±0.02      | 4.42±0.03      | 3.54±0.08      | Knocked out | 3-7                       | K            | 2-24          |
| 316       | 0.018 ± 0.007 | 0.024 ± 0.005 | >10           | >10           | 1.4                      | >563.6               | >563.6           | 4.81±0.05     | 4.96±0.06      | 5.17±0.08      | Knocked<br>out | Knocked out | 1-2                       | $\lambda$    | 2-8           |
| 318       | 0.029 ± 0.008 | 0.185 ± 0.037 | 0.019 ± 0.008 | 0.083 ± 0.032 | 6.3                      | 0.7                  | 2.8              | 4.43±0.04     | 4.96±0.04      | 5.35±0.04      | 6.05±0.02      | 9.30±0.03   | 1-58                      | K            | 3-20          |
| 384       | 0.004 ± 0.001 | 0.005 ± 0.002 | >10           | >10           | 1.1                      | >2398.4              | >2398.4          | 1.19±0.02     | 1.30±0.03      | 1.80±0.03      | 1.75±0.04      | Knocked out | 3-11                      | K            | 1-27          |
| 398       | 0.091 ± 0.004 | 0.180 ± 0.001 | >10           | >10           | 2.0                      | >110.2               | >110.2           | 4.63±0.04     | 10.40±0.10     | 13.60±0.24     | Knocked<br>out | Knocked out | 3-66                      | $\lambda$    | 2-8           |
| AZD1061   | 0.013 ± 0.003 | 0.012 ± 0.002 | 0.014 ± 0.002 | 0.007 ± 0.002 | 0.9                      | 1.1                  | 0.5              | 5.13±0.07     | 8.00±0.12      | 6.14±0.08      | 7.66±0.05      | 2.27±0.03   | N/A                       | N/A          | N/A           |
| AZD8895   | 0.005 ± 0.001 | 0.011 ± 0.002 | 0.046 ± 0.031 | 0.046 ± 0.016 | 2.2                      | 8.9                  | 8.8              | 2.18±0.04     | 2.96±0.05      | 3.56±0.06      | 8.50±0.05      | 7.35±0.15   | N/A                       | N/A          | N/A           |
| AZD7442   | 0.009 ± 0.000 | 0.007 ± 0.001 | 0.012 ± 0.001 | 0.006 ± 0.003 | 0.8                      | 1.4                  | 0.7              | N/A           | N/A            | N/A            | N/A            | N/A         | N/A                       | N/A          | N/A           |
| REGN10987 | 0.032 ± 0.007 | 0.028 ± 0.003 | 0.007 ± 0.001 | 0.013 ± 0.002 | 0.9                      | 0.2                  | 0.4              | 1.35±0.03     | 1.61±0.03      | 1.84±0.04      | 1.39±0.05      | 1.38±0.02   | N/A                       | N/A          | N/A           |
| REGN10933 | 0.004 ± 0.002 | 0.014 ± 0.002 | 3.284 ± 2.014 | 6.177 ± 1.914 | 3.3                      | 773.7                | 1455.2           | 0.97±0.02     | 1.99±0.02      | 1.70±0.01      | 1.92±0.02      | 308.7±10.0  | N/A                       | N/A          | N/A           |
| ADG10     | 0.006 ± 0.000 | 0.010 ± 0.001 | 0.011 ± 0.001 | 0.003 ± 0.000 | 1.8                      | 1.9                  | 0.5              | N/A           | N/A            | N/A            | N/A            | N/A         | N/A                       | N/A          | N/A           |
| ADG20     | 0.004 ± 0.001 | 0.006 ± 0.000 | 0.010 ± 0.001 | 0.009 ± 0.000 | 1.4                      | 2.5                  | 2.2              | N/A           | N/A            | N/A            | N/A            | N/A         | N/A                       | N/A          | N/A           |
| ADG30     | 0.007 ± 0.002 | 0.016 ± 0.001 | 0.029 ± 0.003 | 0.002 ± 0.001 | 2.5                      | 4.4                  | 0.3              | N/A           | N/A            | N/A            | N/A            | N/A         | N/A                       | N/A          | N/A           |
| LY-CoV555 | 0.006 ± 0.002 | 0.009 ± 0.000 | >10           | >10           | 1.5                      | >1545.3              | >1545.3          | N/A           | N/A            | N/A            | N/A            | N/A         | N/A                       | N/A          | N/A           |
| LY-CoV16  | 0.034 ± 0.007 | 3.225 ± 1.030 | >10           | >10           | 1.5                      | >291.2               | >291.2           | N/A           | N/A            | N/A            | N/A            | N/A         | N/A                       | N/A          | N/A           |
| S309      | 0.040 ± 0.005 | 0.078 ± 0.069 | 0.082 ± 0.002 | 0.076 ± 0.014 | 1.5                      | 2.0                  | 1.9              | N/A           | N/A            | N/A            | N/A            | N/A         | N/A                       | N/A          | N/A           |
| 222H+222L | 0.017 ± 0.001 | 0.011 ± 0.002 | 0.016 ± 0.001 | 0.009 ± 0.000 | 0.6                      | 1.0                  | 0.5              | N/A           | N/A            | N/A            | N/A            | N/A         | 3-53                      | K            | 3-20          |
| 150H+222L | 0.016 ± 0.003 | 0.010 ± 0.001 | 0.007 ± 0.001 | 0.003 ± 0.000 | 0.6                      | 0.4                  | 0.2              | N/A           | N/A            | N/A            | N/A            | N/A         | 3-53                      | K            | 3-20          |
| 158H+222L | 0.033 ± 0.003 | 0.014 ± 0.001 | 0.056 ± 0.015 | 0.019 ± 0.000 | 0.4                      | 1.7                  | 0.6              | N/A           | N/A            | N/A            | N/A            | N/A         | 3-53                      | K            | 3-20          |
| 175H+222L | >10           | 0.399 ± 0.012 | >10           | >10           | <0.04                    | N/A                  | N/A              | N/A           | N/A            | N/A            | N/A            | N/A         | 3-53                      | K            | 3-20          |
| 269H+222L | 0.552 ± 0.085 | 0.024 ± 0.001 | >10           | >10           | 0.04                     | >18.1                | >18.1            | N/A           | N/A            | N/A            | N/A            | N/A         | 3-53                      | K            | 3-20          |

Table S3 Results of PDB BLAST for the majority of the mAb 222 light chain sequence, PDB codes shown and residue 30 (within CDR L1) outlined in red. Related to Figure 4.

| Accession | Sequence                    | Residue 30 |
|-----------|-----------------------------|------------|
| 222       | MTOSPGTLLSLSPPERATLSCRASQSV | PSS        |
| 7JMO_L    | MTOSPGTLLSLSPPERATLSCRASQSV | SSS        |
| 4LRN_L    | LTOSPGTLLSLSPPERATLSCRASQSV | SSS        |
| 7K43_D    | MMOSPGTLLSLSPPERATLSCRASQSV | SSS        |
| 40B5_L    | LTOSPGTLLSLSPPERATLSCRASQSV | SSS        |
| 60L6_L    | LTOSPGTLLSLSPPERATLSCRASQSV | SSS        |
| 6026_B    | LTOSPGTLLSLSPPERATLSCRASQSV | SSS        |
| 4M62_L    | LTOSPGTLLSLSPPERATLSCRASQSV | SSS        |
| 5FT5_L    | LTOSPGTLLSLSPPERATLSCRASQSV | SSS        |
| 60L5_L    | LTOSPGTLLSLSPPERATLSCRASQSV | SSS        |
| 5J0F_B    | LTOSPGTLLSLSPPERATLSCRASQSV | SSS        |
| 7LAB_L    | LTOSPGTLLSLSPPERATLSCRASQSV | SSS        |
| 6GHG_B    | LTOSPGTLLSLSPPERATLSCRASQSV | SSS        |
| 6041_A    | LTOSPGTLLSLSPPERATLSCRASQSV | SSS        |
| 6W10_B    | LTOSPGTLLSLSPPERATLSCRASQSV | SSS        |
| 5117_A    | LTOSPGTLLSLSPPERATLSCRASQSV | SSS        |
| 4NP4_L    | LTOSPGTLLSLSPPERATLSCRASQSV | SSS        |
| 4HWB_L    | LTOSPGTLLSLSPPERATLSCRASQSV | SSS        |
| 6CA9_A    | LTOSPGTLLSLSPPERATLSCRASQSV | SSS        |
| 7CDI_L    | LTOSPGTLLSLSPPERATLSCRASQSV | SSS        |
| 7K8N_B    | LTOSPGTLLSLSPPERATLSCRASQSV | SSS        |
| 6BKC_L    | LTOSPGTLLSLSPPERATLSCRASQSV | SSS        |
| 4HWE_L    | LTOSPGTLLSLSPPERATLSCRASQSV | SSS        |
| 7LK9_B    | LTOSPGTLLSLSPPERATLSCRASQSV | SSS        |
| 6XE1_L    | LTOSPGTLLSLSPPERATLSCRASQSV | SSS        |
| 7K8M_B    | LTOSPGTLLSLSPPERATLSCRASQSV | SSS        |
| 7D0C_F    | LTOSPGTLLSLSPPERATLSCRASQSV | SSS        |
| 6025_B    | LTOSPGTLLSLSPPERATLSCRASQSV | SSS        |
| 5GMQ_C    | LTOSPGTLLSLSPPERATLSCRASQSV | SSS        |
| 3QEG_L    | MMOSPGTLLSLSPPERATLSCRASQSV | SSS        |
| 5IBT_L    | LTOSPGTLLSLSPPERATLSCRASQSV | SSS        |
| 7K45_L    | LTOSPGTLLSLSPPERATLSCRASQSV | SSS        |
| 6J09_L    | MTOSPGTLLSLSPPERATLSCRASQSV | SSS        |
| 6MVL_L    | LTOSPGTLLSLSPPERATLSCRASQSV | SSS        |
| 11QD_A    | LTOSPGTLLSLSPPERATLSCRASQSV | SSS        |
| 5Y2L_J    | MTOSPGTLLSLSPPERATLSCRASQSV | SSS        |
| 7ND9_L    | MTOSPGTLLSLSPPERATLSCRASQSV | SSS        |
| 5XMH_C    | LTOSPGTLLSLSPPERATLSCRASQSV | SSS        |
| 5WK0_B    | LTOSPGTLLSLSPPERATLSCRASQSV | SSS        |
| 7BEO_D    | MTOSPGTLLSLSPPERATLSCRASQSV | SSS        |
| 4YPG_A    | LTOSPGTLLSLSPPERATLSCRASQSV | SSS        |
| 5W19_E    | LTOSPGTLLSLSPPERATLSCRASQSV | SSS        |
| 6028_B    | LTOSPGTLLSLSPPERATLSCRASQSV | SSS        |
| 7K3Q_L    | LTOTPGTLLSLSPPERATLSCRASQSV | SSS        |
| 5D1Q_D    | LTOSPGTLLSLSPPERATLSCRASQSV | SSS        |
| 6CA7_L    | LTOSPGTLLSLSPPERATLSCRASQSV | SSS        |
| 5K9J_L    | LTOSPGTLLSLSPPERATLSCRASQSV | SSS        |
| 7NDB_L    | LTOSPGTLLSLSPPERATLSCRASQSV | SSS        |
| 5K9K_B    | LTOSPGTLLSLSPPERATLSCRASQSV | SSS        |
| 5J03_B    | LTOSPGTLLSLSPPERATLSCRASQSV | SSS        |
| 5UAX_L    | LTOSPGTLLSLSPPERATLSCRASQSV | SSS        |
| 6B0A_L    | LTOSPGTLLSLSPPERATLSCRASQSV | SSS        |
| 7NDC_E    | LTOSPGTLLSLSPPERATLSCRASQSV | SSS        |
| 5TRU_L    | LTOSPGTLLSLSPPERATLSCRASQSV | SSS        |
| 6WPS_D    | LTOSPGTLLSLSPPERATLSCRASQSV | SSS        |
| 6EHV_X    | LTOSPGTLLSLSPPERATLSCRASQSV | SSS        |
| 6B3D_D    | LTOSPGTLLSLSPPERATLSCRASQSV | SSS        |
| 5W1K_C    | LTOSPGTLLSLSPPERATLSCRASQSV | SSS        |
| 6XC4_L    | LTOSPGTLLSLSPPERATLSCRASQSV | SSS        |
| 6CMG_B    | MTOSPGTLLSLSPPERATLSCRASQSV | SSS        |
| 7KN6_L    | LTOSPGTLLSLSPPERATLSCRASQSV | SSS        |
| 4F0L_L    | LTOSPGTLLSLSPPERATLSCRASQSV | SSS        |
| 5X8M_C    | LTOSPGTLLSLSPPERATLSCRASQSV | SSS        |
| 5XJ4_L    | LTOSPGTLLSLSPPERATLSCRASQSV | SSS        |
| 5Y0A_E    | LTOSPGTLLSLSPPERATLSCRASQSV | SSS        |
| 1U6A_L    | LTOSPGTLLSLSPPERATLSCRASQSV | SSS        |
| 6W56_B    | LTOSPGTLLSLSPPERATLSCRASQSV | SSS        |
| 6B9J_B    | LTOSPGTLLSLSPPERATLSCRASQSV | SSS        |
| 4KXZ_I    | LTOSPGTLLSLSPPERATLSCRASQSV | SSS        |
| 7BEN_F    | MTOSPGTLLSLSPPERATLSCRASQSV | SSS        |
| 7K8U_L    | LTOSPGTLLSLSPPERATLSCRASQSV | SSS        |
| 3S03_B    | LTOSPGTLLSLSPPERATLSCRASQSV | SSS        |
| 4QXG_L    | LTOSPGTLLSLSPPERATLSCRASQSV | SSS        |
| 6BK6_L    | LTOSPGTLLSLSPPERATLSCRASQSV | SSS        |
| 5D1X_D    | LTOTPATLLSLSPPERATLSCRASQSV | SSS        |
| 3W9D_B    | LTOSPGTLLSLSPPERATLSCRASQSV | SSS        |
| 4KV5_E    | LTOSPGTLLSLSPPERATLSCRASQSV | SSS        |
| 4IDJ_L    | LTOSPGTLLSLSPPERATLSCRASQSV | SSS        |
| 4N90_E    | LTOSPGTLLSLSPPERATLSCRASQSV | SSS        |
| 6W04_L    | LTOSPGTLLSLSPPERATLSCRASQSV | SSS        |
| 6029_L    | LTOSPGTLLSLSPPERATLSCRASQSV | SSS        |
| 5WYM_A    | LTOSPATLLSLSPPERATLSCRASQSV | SSS        |
| 7J00_L    | LTOSPGTLLSLSPPERATLSCRASQSV | SSS        |
| 5V7R_L    | MTOSPGTLLSLSPPERATLSCRASQSV | SSS        |
| 7AH1_A    | LTOSPGTLLSLSPPERATLSCRASQSV | SSS        |
| 35DY_L    | MTOSPGTLLSLSPPERATLSCRASQSV | SSS        |
| 6N7J_B    | MTOSPGTLLSLSPPERATLSCRASQSV | SSS        |
| 1DN0_A    | LTOSPATLLSLSPPERATLSCRASQSV | SSS        |
| 5UJZ_G    | LTOSPGTLLSLSPPERATLSCRASQSV | SSS        |
| 6MTQ_L    | LTOSPATLLSLSPPERATLSCRASQSV | SSS        |
| 6GFE_L    | LTOSPATLLSLSPPERATLSCRASQSV | SSS        |
| 7CH5_L    | LTOSPATLLSLSPPERATLSCRASQSV | SSS        |
| 5CSZ_B    | LTOSPATLLSLSPPERATLSCRASQSV | SSS        |
| 6BKD_L    | LTOSPGTLLSLSPPERATLSCRASQSV | SSS        |
| 5IBU_B    | LTOSPGTLLSLSPPERATLSCRASQSV | SSS        |
| 1RH4_H    | LTOSPGTLLSLSPPERATLSCRASQSV | SSS        |
| 6W1Y_L    | LTOSPGTLLSLSPPERATLSCRASQSV | SSS        |
| 6W1Z_L    | LTOSPGTLLSLSPPERATLSCRASQSV | SSS        |
| 5GS1_A    | LTOSPATLLSLSPPERATLSCRASQSV | SSS        |
| 5W4L_C    | LTOSPGTLLSLSPPERATLSCRASQSV | SSS        |

Table S4A Neutralization of Victoria and P.1 virus by convalescent plasma (infection with original Victoria-like virus), related to Figure 6

| Convalescent plasma | FRNT50 (Reciprocal plasma dilution) |      | Victoria/P.1 ratio |
|---------------------|-------------------------------------|------|--------------------|
|                     | Victoria                            | P.1  |                    |
| Convalescent 1      | 61                                  | 25   | 2.5                |
| Convalescent 2      | 689                                 | 49   | 14.2               |
| Convalescent 3      | 526                                 | 173  | 3.0                |
| Convalescent 4      | 409                                 | 356  | 1.1                |
| Convalescent 5      | 369                                 | 105  | 3.5                |
| Convalescent 6      | 1270                                | 556  | 2.3                |
| Convalescent 7      | 274                                 | 80   | 3.4                |
| Convalescent 8      | 633                                 | 223  | 2.8                |
| Convalescent 9      | 667                                 | 126  | 5.3                |
| Convalescent 10     | 124                                 | 34   | 3.7                |
| Convalescent 11     | 102                                 | 30   | 3.4                |
| Convalescent 12     | 339                                 | 74   | 4.6                |
| Convalescent 13     | 331                                 | 240  | 1.4                |
| Convalescent 14     | 438                                 | 95   | 4.6                |
| Convalescent 15     | 6397                                | 3261 | 2.0                |
| Convalescent 16     | 44                                  | 39   | 1.1                |
| Convalescent 17     | 1115                                | 87   | 12.8               |
| Convalescent 18     | 242                                 | 64   | 3.8                |
| Convalescent 19     | 29                                  | 20   | 1.4                |
| Convalescent 20     | 154                                 | 136  | 1.1                |
| Convalescent 21     | 487                                 | 165  | 3.0                |
| Convalescent 22     | 438                                 | 241  | 1.8                |
| Convalescent 23     | 381                                 | 83   | 4.6                |
| Convalescent 24     | 1647                                | 390  | 4.2                |
| Convalescent 25     | 913                                 | 322  | 2.8                |
| Convalescent 26     | 1880                                | 825  | 2.3                |
| Convalescent 27     | 1464                                | 206  | 7.1                |
| Convalescent 28     | 361                                 | 81   | 4.4                |
| Convalescent 29     | 2859                                | 1010 | 2.8                |
| Convalescent 30     | 1109                                | 477  | 2.3                |
| Convalescent 31     | 811                                 | 274  | 3.0                |
| Convalescent 32     | 395                                 | 130  | 3.0                |
| Convalescent 33     | 1144                                | 207  | 5.5                |
| Convalescent 34     | 676                                 | 201  | 3.4                |

Table S4B Neutralization of Victoria and P.1 virus by B.1.1.7 plasma, related to Figure 6

| B.1.1.7 plasma | Day post symptom onset | FRNT50 (Reciprocal plasma dilution) |       | Victoria/P.1 ratio |
|----------------|------------------------|-------------------------------------|-------|--------------------|
|                |                        | Victoria                            | P.1   |                    |
| B.1.1.7 P3     | 11                     | 440                                 | 116   | 3.8                |
| B.1.1.7 P4     | 18                     | 136884                              | 48440 | 2.8                |
| B.1.1.7 P5     | 45                     | 1506                                | 787   | 1.9                |
| B.1.1.7 P6     | 31                     | 370                                 | 259   | 1.4                |
| B.1.1.7 P7     | 33                     | 2250                                | 267   | 8.4                |
| B.1.1.7 P8     | 25                     | 2999                                | 2261  | 1.3                |
| B.1.1.7 P9     | 26                     | 970                                 | 861   | 1.1                |
| B.1.1.7 P10    | 18                     | 3735                                | 861   | 4.3                |
| B.1.1.7 P11    | 24                     | 2193                                | 1116  | 2.0                |
| B.1.1.7 P13    | 29                     | <20                                 | 67    | <0.3               |
| B.1.1.7 P14    | 21                     | 1700                                | 168   | 10.1               |
| B.1.1.7 P15    | 16                     | 168                                 | 414   | 0.4                |

Table S5 Neutralisation of Victoria and P.1 viruses by immune serum from vaccinees, related to Figure 7

| Vaccine samples | Day Post-boost | FRNT50 (Reciprocal serum dilution) |      | Victoria/P.1 ratio |
|-----------------|----------------|------------------------------------|------|--------------------|
|                 |                | Victoria                           | P.1  |                    |
| Pfizer1         | 7              | 1149                               | 396  | 2.9                |
| Pfizer2         | 7              | <20                                | 36   | <0.6               |
| Pfizer3         | 7              | 1727                               | 698  | 2.5                |
| Pfizer4         | 8              | 2234                               | 712  | 3.1                |
| Pfizer5         | 7              | 3016                               | 1033 | 2.9                |
| Pfizer6         | 7              | 1521                               | 302  | 5.0                |
| Pfizer7         | 7              | 609                                | 294  | 2.1                |
| Pfizer8         | 7              | 4340                               | 2119 | 2.0                |
| Pfizer9         | 7              | 1467                               | 361  | 4.1                |
| Pfizer10        | 7              | 1757                               | 343  | 5.1                |
| Pfizer11        | 7              | 860                                | 424  | 2.0                |
| Pfizer12        | 7              | 1749                               | 452  | 3.9                |
| Pfizer13        | 7              | 1851                               | 669  | 2.8                |
| Pfizer14        | 7              | 407                                | 294  | 1.4                |
| Pfizer15        | 8              | 1285                               | 571  | 2.3                |
| Pfizer16        | 8              | 1286                               | 311  | 4.1                |
| Pfizer17        | 8              | 1810                               | 304  | 6.0                |
| Pfizer18        | 8              | 1198                               | 282  | 4.3                |
| Pfizer19        | 8              | 466                                | 229  | 2.0                |
| Pfizer20        | 8              | 1539                               | 693  | 2.2                |
| Pfizer21        | 9              | 184                                | 52   | 3.5                |
| Pfizer22        | 11             | 1061                               | 491  | 2.2                |
| Pfizer23        | 12             | 1658                               | 355  | 4.7                |
| Pfizer24        | 12             | 1155                               | 569  | 2.0                |
| Pfizer25        | 15             | 8092                               | 5029 | 1.6                |
| AstraZeneca 1   | 28             | 495                                | 265  | 1.9                |
| AstraZeneca 2   | 28             | 580                                | 429  | 1.4                |
| AstraZeneca 3   | 28             | 253                                | <20  | >12.6              |
| AstraZeneca 4   | 28             | 183                                | 102  | 1.8                |
| AstraZeneca 5   | 28             | 432                                | 215  | 2.0                |
| AstraZeneca 6   | 28             | 764                                | 111  | 6.9                |
| AstraZeneca 7   | 28             | 133                                | 29   | 4.5                |
| AstraZeneca 8   | 28             | 257                                | 116  | 2.2                |
| AstraZeneca 9   | 28             | 501                                | 97   | 5.2                |
| AstraZeneca 10  | 28             | 357                                | 133  | 2.7                |
| AstraZeneca 11  | 14             | 334                                | 115  | 2.9                |
| AstraZeneca 12  | 14             | 250                                | 94   | 2.7                |
| AstraZeneca 13  | 14             | 122                                | 40   | 3.1                |
| AstraZeneca 14  | 14             | 212                                | 110  | 1.9                |
| AstraZeneca 15  | 14             | 789                                | 281  | 2.8                |
| AstraZeneca 16  | 14             | 538                                | 181  | 3.0                |
| AstraZeneca 17  | 14             | 1159                               | 359  | 3.2                |
| AstraZeneca 18  | 14             | 353                                | 85   | 4.1                |
| AstraZeneca 19  | 14             | 975                                | 382  | 2.6                |
| AstraZeneca 20  | 14             | 169                                | 74   | 2.3                |
| AstraZeneca 21  | 14             | 155                                | 87   | 1.8                |
| AstraZeneca 22  | 14             | 152                                | 98   | 1.5                |
| AstraZeneca 23  | 14             | 126                                | 67   | 1.9                |
| AstraZeneca 24  | 14             | 293                                | 151  | 1.9                |
| AstraZeneca 25  | 14             | 94                                 | 25   | 3.8                |
